# Supplementary material
Source: PubMed Central journal article supplement (PMC4594064)
Supplement: CJN.02020215_CJN02020215SupplementaryData.pdf [file CJN.02020215_CJN02020215SupplementaryData.pdf]

## **Supplemental Material**

### **Author Affiliations**

Ana C. Ricardo, MD, MPH: Division of Nephrology, Department of Medicine, University of Illinois, Chicago, IL.

Michael F. Flessner, MD, PhD: National Institute of Diabetes and Digestive and Kidney Diseases, National Institutes of Health, Bethesda, MD.

John H. Eckfeldt, MD, PhD: Department of Laboratory Medicine and Pathology, University of Minnesota Medical Center, Minneapolis, MN.

Paul W. Eggers, PhD: National Institute of Diabetes and Digestive and Kidney Diseases, National Institutes of Health, Bethesda, MD.

Nora Franceschini, MD, MPH: Department of Epidemiology, Gillings School of Global Public Health, University of North Carolina, Chapel Hill, NC.

Alan S. Go, MD: Kaiser Permanente Northern California Division of Research, Oakland, CA.

Nathan M. Gotman, MS: Collaborative Studies Coordinating Center, University of North Carolina, Chapel Hill, NC.

Holly J. Kramer, MD, MPH: Division of Nephrology and Hypertension, Department of Medicine, Loyola University, Chicago, IL.

John W. Kusek, PhD: National Institute of Diabetes and Digestive and Kidney Diseases, National Institutes of Health, Bethesda, MD.

Laura R. Loehr, MD, PhD: Collaborative Studies Coordinating Center, University of North Carolina, Chapel Hill, NC.

Michal L. Melamed, MD: Division of Nephrology, Department of Medicine, Albert Einstein College of Medicine, Bronx, NY.

Carmen A. Peralta, MD, MAS: Division of Nephrology, Department of Medicine, University of California, San Francisco, CA.

Leopoldo Raij, MD: Division of Nephrology and Hypertension, Department of Medicine, Miller School of Medicine, University of Miami, Miami, FL.

Sylvia E. Rosas, MD, MSCE: Joslin Diabetes Center and Beth Israel Deaconess Medical Center, Harvard Medical School, Boston, MA.

Gregory A. Talavera, MD, MPH: Division of Health Promotion and Behavioral Science, School of Public Health, San Diego State University, San Diego, CA.

James P. Lash, MD: Division of Nephrology, Department of Medicine, University of Illinois, Chicago, IL.
